# Supplementary material
Source: publisher figshare collection journal article supplement (https://acs.figshare.com/ndownloader/files/10443186)
Supplement: Supplementary file 1 [file 10443186]

## Supporting Information.

### Polymorphism in $\text{Li}_4\text{Zn}(\text{PO}_4)_2$ and stabilization of its structural disorder to improve ionic conductivity

Sujoy Saha<sup>†‡§</sup>, Gwenaëlle Rousse<sup>†‡§</sup>, Ignacio Blazquez Alcover<sup>†§</sup>,  
Mathieu Courty<sup>§⊥</sup>, Daniel Alves Dalla Corte<sup>†‡§</sup> and Jean-Marie Tarascon<sup>†‡§\*</sup>

<sup>†</sup> Collège de France, Chaire de Chimie du Solide et de l'Energie, UMR 8260, 11 place Marcelin Berthelot, 75231 Paris CEDEX 05, France

<sup>‡</sup> Sorbonne Universités – UPMC Univ Paris 06, 4 place Jussieu, F-75005 Paris, France

<sup>§</sup> Réseau sur le Stockage Electrochimique de l'Energie (RS2E), FR CNRS 3459 – France

<sup>⊥</sup> Laboratoire de Réactivité et Chimie des Solides, Université de Picardie Jules Verne, 33 Rue Saint Leu, 80039 Amiens, France

**\*Corresponding author:** Jean-Marie Tarascon, [jean-marie.tarascon@college-de-france.fr](mailto:jean-marie.tarascon@college-de-france.fr)

### Direct Current (DC) Polarization measurement.

The electronic conductivity was determined by the DC polarization method to differentiate electronic contribution to the ionic conductivity. The  $\beta'$ - $\text{Li}_{3.5}\text{Zn}_{0.5}\text{Ga}_{0.5}(\text{PO}_4)_2$  sample was chosen as a representative for the measurement. DC voltages of 1, 1.25, and 1.5 V were applied to the sample pellet placed between two Pt electrodes prior to reach steady-state over 20 mins. The resistance was then obtained using Ohm's law and the results are summarized in Figure S9. The electronic conductivity at room temperature was obtained by extrapolation of the Arrhenius plot, and leads to a value of  $\sim 1.2 \cdot 10^{-16} \text{ S} \cdot \text{cm}^{-1}$ , which is three orders of magnitude lower than the ionic conductivity at RT measured by AC Impedance spectra. This demonstrated that the electronic contribution can be neglected and the transference number of  $\text{Li}^+$  ions in the  $\text{Li}_{3.5}\text{Zn}_{0.5}\text{Ga}_{0.5}(\text{PO}_4)_2$  electrolytes is approximately unity.

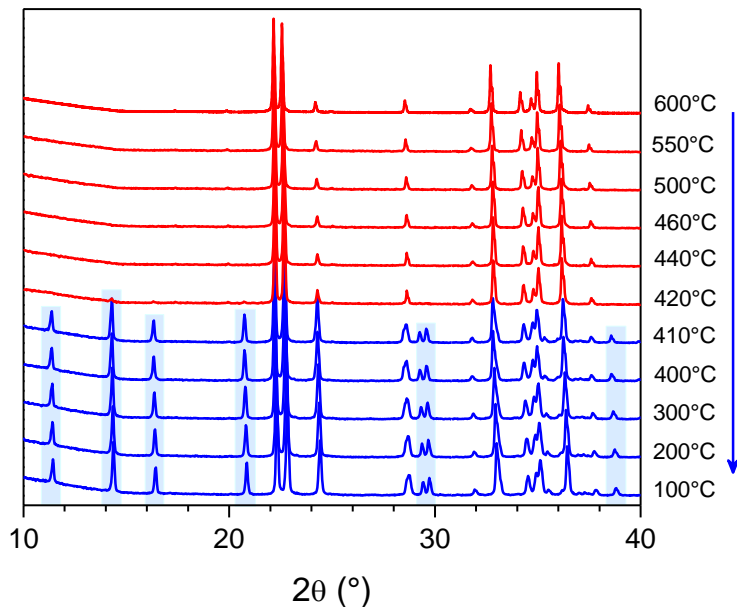

**Figure S1.** Evolution of XRD patterns of  $\text{Li}_4\text{Zn}(\text{PO}_4)_2$  with temperature during cooling. Values of temperatures corresponding to the patterns are indicated at the right. The patterns colored in blue and red corresponds to the  $\alpha$ - and  $\beta$ - polymorphs, respectively, and the peaks that reappear for the  $\alpha$ - phase has been indicated by blue backgrounds.

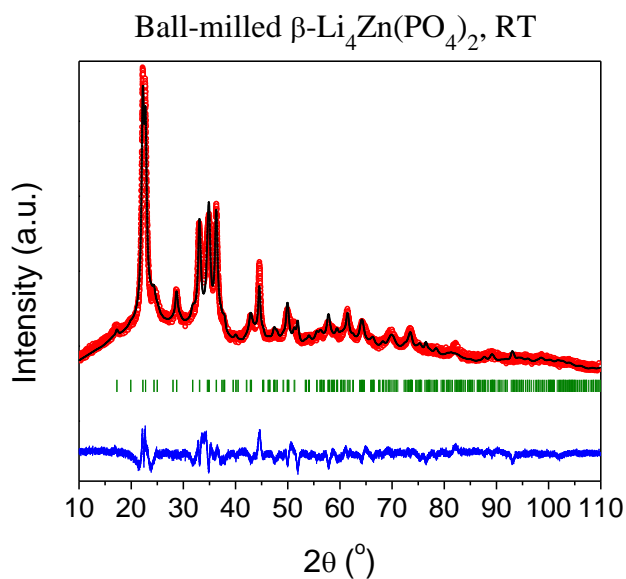

**Figure S2.** Rietveld refinement of the XRD pattern of the ball-milled  $\beta\text{-Li}_4\text{Zn}(\text{PO}_4)_2$  sample, measured at room temperature. The red circles, black continuous line, blue line and green tick bars represent the observed, calculated, and difference patterns, and Bragg positions, respectively.

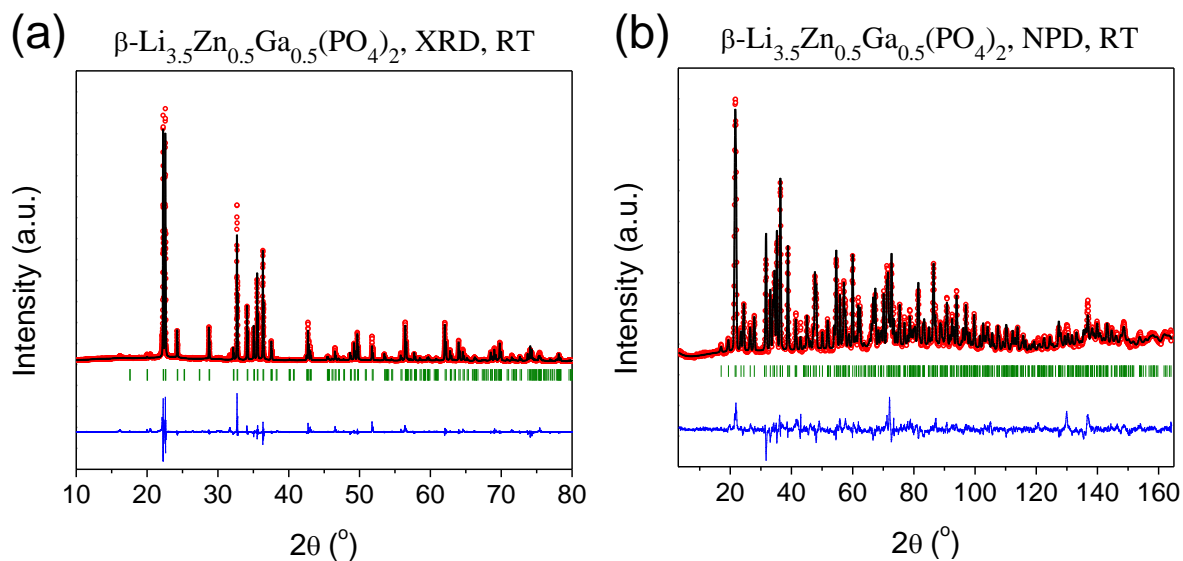

**Figure S3.** Rietveld refinement of the room temperature XRD (a), and NPD (b) patterns of  $\beta\text{-Li}_{3.5}\text{Zn}_{0.5}\text{Ga}_{0.5}(\text{PO}_4)_2$ . The red circles, black continuous line, blue line and green tick bars represent the observed, calculated, and difference patterns, and Bragg positions, respectively.

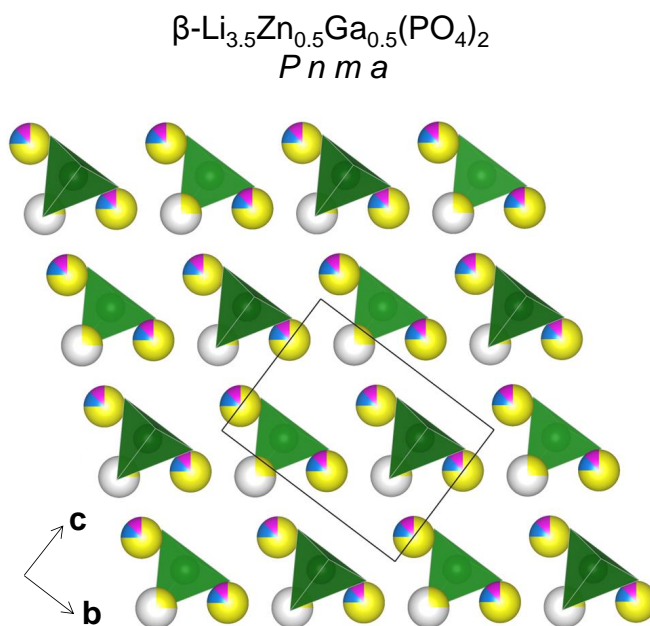

**Figure S4.** Crystal structure of  $\beta\text{-Li}_{3.5}\text{Zn}_{0.5}\text{Ga}_{0.5}(\text{PO}_4)_2$ , the unit cell is shown in black parallelogram. For sake of clarity, only half of the unit cell content ( $0 \leq y \leq \frac{1}{2}$  in the monoclinic setting) is shown. Li, Zn and Ga are shown in blue, yellow and pink, respectively and  $\text{PO}_4$  tetrahedra are colored in green.

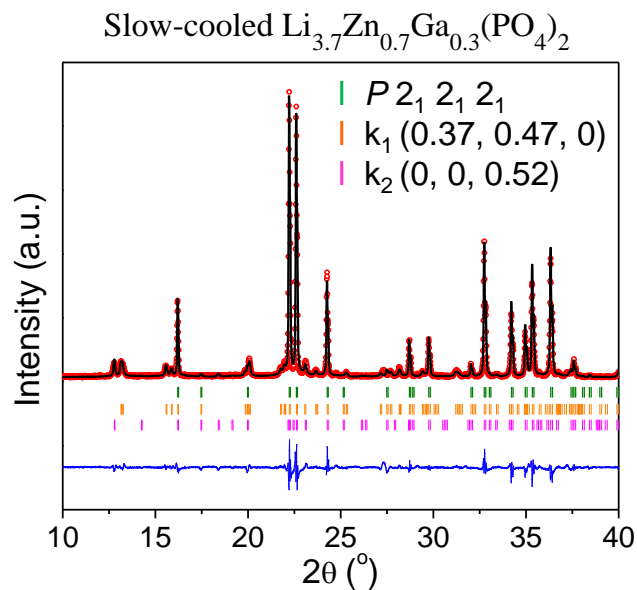

**Figure S5.** Rietveld refinement of the room temperature XRD pattern of  $\text{sc-Li}_{3.7}\text{Zn}_{0.7}\text{Ga}_{0.3}(\text{PO}_4)_2$  using the  $P 2_1 2_1 2_1$  unit cell and  $k_1$  and  $k_2$  propagation vectors. The red circles, black continuous line, blue line and represent the observed, calculated, and difference patterns, respectively. Tick bars represent the Bragg positions of the respective phases as indicated in the legends.

**(a)**  $\beta'\text{-Li}_{3.7}\text{Zn}_{0.7}\text{Ga}_{0.3}(\text{PO}_4)_2$ , XRD, 600 °C

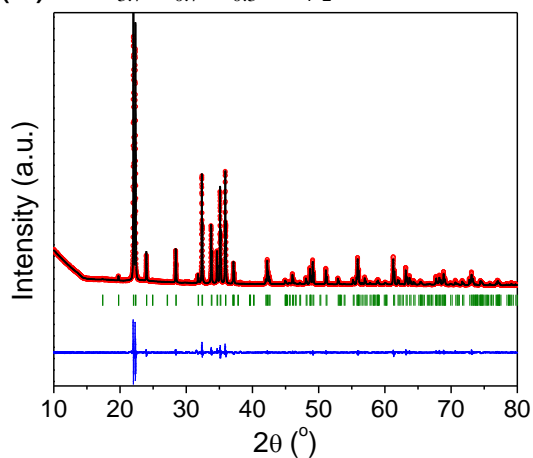

**(b)**  $\beta'\text{-Li}_{3.7}\text{Zn}_{0.7}\text{Ga}_{0.3}(\text{PO}_4)_2$ , NPD, 600 °C

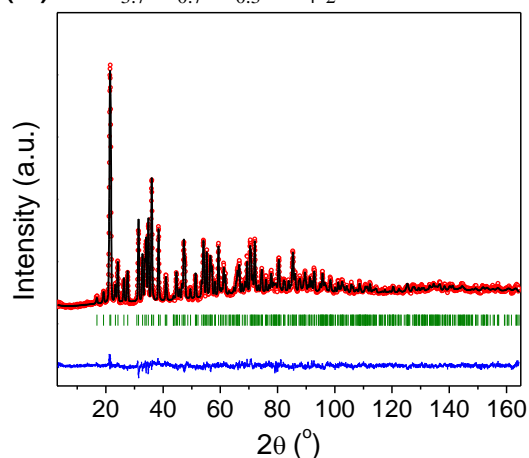

**Figure S6.** Rietveld refinement of the XRD (a), and NPD (b) patterns of  $\beta'\text{-Li}_{3.7}\text{Zn}_{0.7}\text{Ga}_{0.3}(\text{PO}_4)_2$  at 600 °C. The red circles, black continuous line, blue line and green tick bars represent the observed, calculated, and difference patterns, and Bragg positions, respectively.

**Table S1. Structural Parameters for  $\beta\text{-Li}_{3.7}\text{Zn}_{0.7}\text{Ga}_{0.3}(\text{PO}_4)_2$  deduced from the combined Rietveld refinement of the XRD and neutron patterns recorded at 600 °C.**

| $\beta\text{-Li}_{3.7}\text{Zn}_{0.7}\text{Ga}_{0.3}(\text{PO}_4)_2$ , 600 °C<br>Space group $P n m a$<br>$a = 10.20903(3) \text{ \AA}$ , $b = 6.57170(2) \text{ \AA}$ , $c = 4.996639(16) \text{ \AA}$ ,<br>$V = 333.66(6) \text{ \AA}^3$ , $Z = 2$ |      |             |           |           |                  |                   |
|------------------------------------------------------------------------------------------------------------------------------------------------------------------------------------------------------------------------------------------------------|------|-------------|-----------|-----------|------------------|-------------------|
| atom                                                                                                                                                                                                                                                 | site | x           | y         | z         | $B_{\text{iso}}$ | Occupancy         |
| P1                                                                                                                                                                                                                                                   | 4c   | 0.40749(13) | 0.75      | 0.8135(3) | 2.01(6)          | 1                 |
| O1                                                                                                                                                                                                                                                   | 8d   | 0.34021(19) | 0.5588(2) | 0.6975(4) | 2.99(5)          | 1                 |
| O2                                                                                                                                                                                                                                                   | 4c   | 0.5519(2)   | 0.75      | 0.7386(5) | 2.99(5)          | 1                 |
| O4                                                                                                                                                                                                                                                   | 4c   | 0.6100(2)   | 0.25      | 0.8821(4) | 2.99(5)          | 1                 |
| Li1/Zn1/Ga1                                                                                                                                                                                                                                          | 8d   | 0.15404(19) | 0.5003(2) | 0.8062(4) | 3.34(8)          | 0.750/0.175/0.075 |
| Li3                                                                                                                                                                                                                                                  | 4c   | 0.922(3)    | 0.25      | 0.781(6)  | 7.4(9)           | 0.35              |

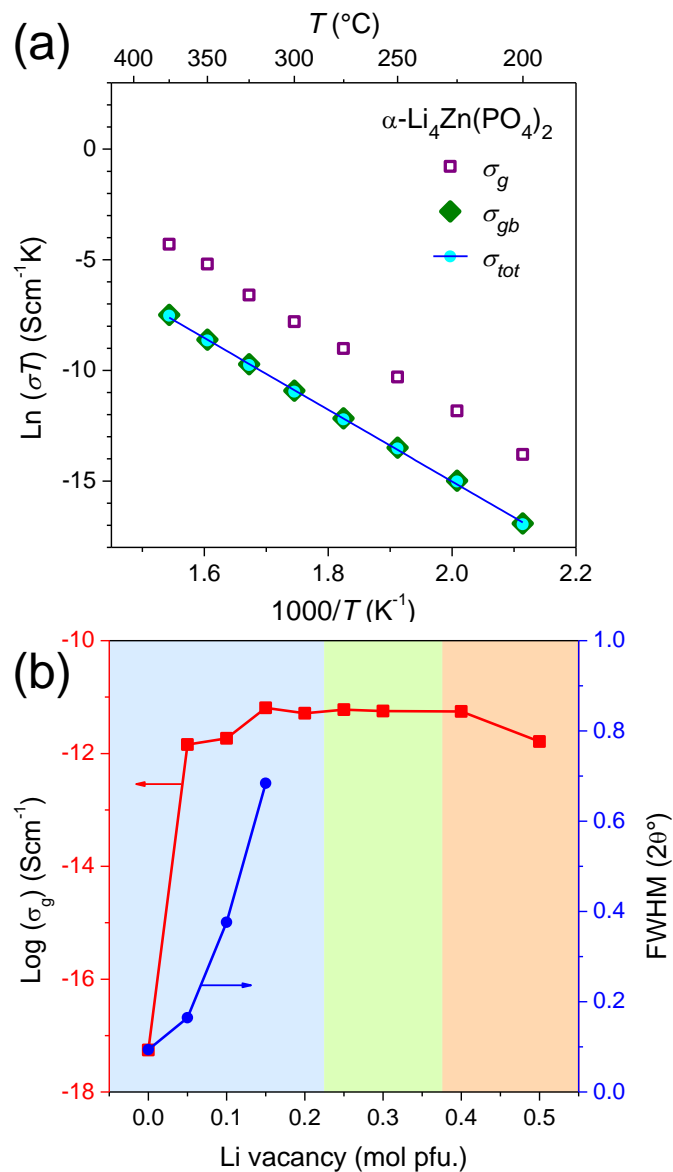

**Figure S7.** (a) Ionic conductivity of  $\alpha$ -  $\text{Li}_4\text{Zn}(\text{PO}_4)_2$  sample. (b) Variation of ionic conductivity and broadening of XRD peak with concentration of Li vacancy. The (100) peak of the XRD pattern at  $2\theta = 16.3^{\circ}$  was chosen to estimate the FWHM. The light blue, green and red background represent  $\alpha$ -,  $\beta'$ -, and  $\beta$ - polymorphs, respectively.

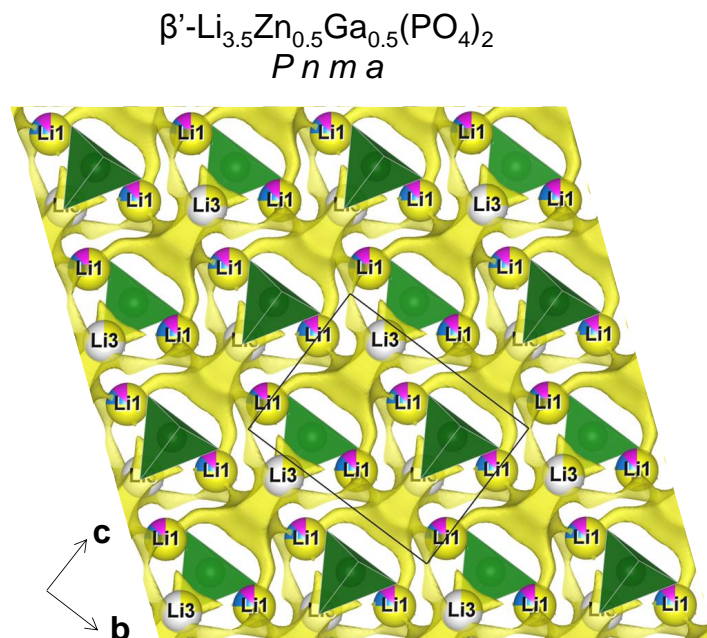

**Figure S8.** BVEL of  $\beta\text{-Li}_{3.5}\text{Zn}_{0.5}\text{Ga}_{0.5}(\text{PO}_4)_2$ , at the percolation energies. The yellow domains indicate the migration paths for  $\text{Li}^+$  in the structure, obtained using an iso-surface value of 1.1 eV above the minimum energy. For color codes refer to Figure S3.

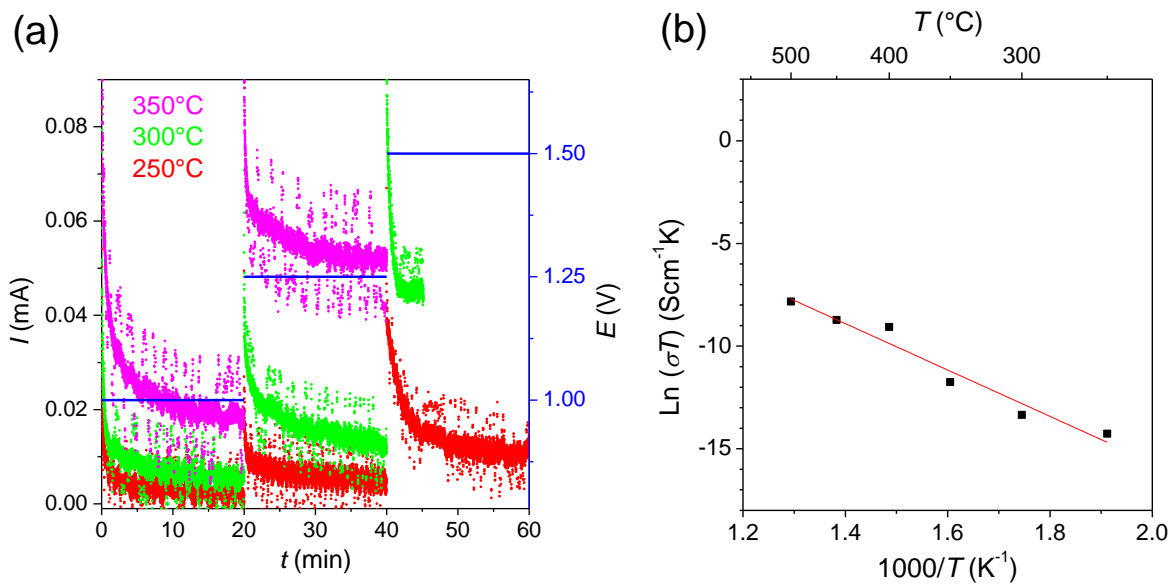

**Figure S9.** (a) DC polarization plots of  $\beta\text{-Li}_{3.7}\text{Zn}_{0.7}\text{Ga}_{0.3}(\text{PO}_4)_2$  sample at different potentials and temperatures. (b) Arrhenius plot of DC conductivity of the sample.
